# Supplementary material
Source: PubMed Central journal article supplement (PMC3122165)
Supplement: supp_M111.222091_jbc.M111.222091-1.pdf [file supp_M111.222091_jbc.M111.222091-1.pdf]

# Supporting Information

## **Structure and immunological characterization of the capsular polysaccharide of a pyrogenic liver abscess *Klebsiella pneumoniae*: activation of macrophages through Toll-like receptor 4**

Feng-Ling Yang<sup>1</sup>, Yu-Liang Yang<sup>1</sup>, Pei-Chun Liao<sup>2</sup>, Ju-Ching Chou<sup>2</sup>, Keng-Chang Tsai<sup>3</sup>, An-Suei Yang<sup>3</sup>, Fuu Sheu<sup>4</sup>, Tzu-Lung Lin<sup>5</sup>, Pei-Fang Hsieh<sup>5</sup>, Jin-Town Wang<sup>5,6</sup>, Kuo-Feng Hua<sup>2,\*</sup>, and Shih-Hsiung Wu<sup>1,\*</sup>

<sup>1</sup>Institute of Biological Chemistry, Academia Sinica, Taipei, Taiwan; <sup>2</sup>Institute of Biotechnology, National Ilan University, Ilan, Taiwan; <sup>3</sup>Genomics Research Center, Academia Sinica, Taipei, Taiwan; <sup>4</sup>Department of Horticulture, National Taiwan University, Taipei, Taiwan; <sup>5</sup>Department of Microbiology, National Taiwan University, Taipei, Taiwan; <sup>6</sup>Department of Internal Medicine, National Taiwan University Hospital, Taipei, Taiwan.

Running title: PLA *K. pneumoniae* CPS activates macrophages via TLR4

\*Addresses for correspondence: Dr. Kuo-Feng Hua, 1, Sec. 1, Shen-Lung Road, I-Lan, 260, Taiwan. Tel: +(886)-3-935-7400, ext. 585; Fax: +(886)-3-931-1526.; E-mail: kfhua@niu.edu.tw; or Dr. Shih-Hsiung Wu, 128 Academia Road, Section 2, Nankang, Taipei 115, Taiwan. Tel: +(886)-2-2785-5696, ext. 7101; Fax: +(886)-2-2653-9142; E-mail: [shwu@gate.sinica.edu.tw](mailto:shwu@gate.sinica.edu.tw).

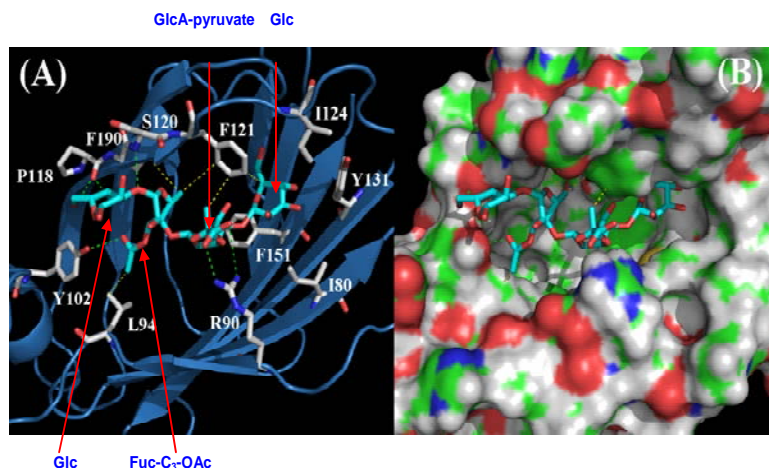

**Supporting data.** Computational molecular models of the PLA *K. pneumoniae* CPS in the active site of TLR4 are shown in panels (A) and (B). In panel (A), carbon atoms in the PLA *K. pneumoniae* CPS are colored as cyan. The carbon atoms of TLR4 are shown in gray. Nitrogen and oxygen are colored as blue and red, respectively. The TLR4 backbone structure is shown as a blue tube. Side-chains of TLR4 residues within a 7Å radius centered on the PLA *K. pneumoniae* CPS are shown explicitly. Secondary structure elements are shown as a ribbon drawing and important residues involved in PLA *K. pneumoniae* CPS binding are labeled. The green and yellow dotted lines represent, respectively, tentative hydrogen bonding donor-acceptor pairs or hydrophobic interactions of the PLA *K. pneumoniae* CPS with TLR4. In panel (B), the carbon atoms of TLR4 are shown in green, while nitrogen, oxygen, and hydrogen are colored blue, red, or gray, respectively. The molecular models were generated using PyMOL software.
